# Supplementary material for: Risk factors of preoperative complications after colorectal surgery in elderly and relationship between postoperative complications and long-term survival
Source: Research Square preprint supplement (doi:10.21203/rs.3.rs-6798855/v1), 2025-06-17
Supplement: Supplementary file 1 [file 6f4577313ee9730348936f79.xlsx]

## Sheet: Sheet1
Table 4: Comparison of procedure methods between right side colon and left side colon and rectum.
	Radical resection	Resection and stoma	Stoma	Bypass
Total	204	37	16	1
Right side	123	3	5	1
Left side	81	34	11	0
