# Supplementary material for: Risk factors of preoperative complications after colorectal surgery in elderly and relationship between postoperative complications and long-term survival
Source: Research Square preprint supplement (doi:10.21203/rs.3.rs-6798855/v1), 2025-06-17
Supplement: Supplementary file 2 [file 9f915b3f490319c3881295fc.xlsx]

## Sheet: Sheet1
Table 3: Patient characteristics, tumor location, procedure, and postoperative complications.
	n	%
Gender
male	137	53.1008
female	121	46.8992
Comorbidity
Hypertension	150	58.1395
Cardiovascular	83	32.1705
Respiratory	11	4.26357
Neurogenic and mental disorder	45	17.4419
Diabetes mellitus	56	21.7054
Other	101	39.1473
None	31	12.0155
Tumor location
Appendix	2	0.775194
Cecum	33	12.7907
Ascending	63	24.4186
Transverse	34	13.1783
Descending	8	3.10078
Sigmoid	53	20.5426
Rectum	58	22.4806
Anus	7	2.71318
Procedure
Radical resection	204	79.0698
Resection and stoma	37	14.3411
Stoma	16	6.20155
Bypass	1	0.387597
