# Supplementary material for: Risk factors of preoperative complications after colorectal surgery in elderly and relationship between postoperative complications and long-term survival
Source: Research Square preprint supplement (doi:10.21203/rs.3.rs-6798855/v1), 2025-06-17
Supplement: Supplementary file 3 [file a98ddfe8426803552d45ee2a.xlsx]

## Sheet: Table 1
Table 2: Estimation of Physiology Ability and Surgical Stress.
1. PRS = -0.0686 + 0.00345X1 + 0.323X2 + 0.205X3 + 0.153X4 + 0.148X5 + 0.0666X6 X1, age; X2, presence (1) or absence (0) of severe heart disease; X3, presence (1) or absence (0) of severe pulmonary disease; X4, presence (1) or absence (0) of diabetes mellitus; X5, performance status index (0–4); X6, American Society of Anesthesiologists physiological status classification (1–5) Severe heart disea…
VC, vital capacity; FEV, forced expiratory volume
