# Supplementary material for: Risk factors of preoperative complications after colorectal surgery in elderly and relationship between postoperative complications and long-term survival
Source: Research Square preprint supplement (doi:10.21203/rs.3.rs-6798855/v1), 2025-06-17
Supplement: Supplementary file 4 [file aa2dda0e3231125c6ba89ee8.xlsx]

## Sheet: Sheet1
Table 6: Prevalence of postoperative complications and potential risk factors for postoperative complications in CRC surgery for elderly (univariate and multivariate analyses).
	Univariate analysis			Multivariate analysis
	GroupA	GroupB	P value	Odds ratio	95%CI	P value
ASA ≥ 3	6	8	0.011	1.34	0.27-6.80	0.722
< 3	185	59
ECOG-PS ≥ 3	10	5	0.546
< 3	181	62
SIRS Yes	0	7	<0.001	2.68×106	0.00-∞	0.986
No	191	60
POSSUM PS ≥ 27	69	47	<0.001	1.79	0.70-4.61	0.228
< 27	122	20
POSSUM OS ≥ 13	34	33	<0.001	1.69	0.76-3.76	0.199
< 13	157	34
POSSUM morbidity ≥ 60.6	74	57	<0.001	3.59	1.27-10.10	0.016
< 60.6	117	10
E-PASS PRS ≥ 0.50	131	59	0.002	2.24	0.85-5.91	0.105
< 0.50	60	8
E-PASS SSS ≥ -0.09	3	19	<0.001	11.8	2.59-54.10	0.001
< -0.09	188	48
E-PASS CRS ≥ 0.07	52	39	<0.001	1.09	0.51-2.33	0.817
< 0.07	139	28
Tumor staging 0,1,2	120	43	0.884
3,4	71	24
