# Supplementary material for: Risk factors of preoperative complications after colorectal surgery in elderly and relationship between postoperative complications and long-term survival
Source: Research Square preprint supplement (doi:10.21203/rs.3.rs-6798855/v1), 2025-06-17
Supplement: Supplementary file 5 [file b00fbf5d23a6e2a2a5104a88.xlsx]

## Sheet: Table 1
Table 1: POSSUM Scoring system.
The equations for POSSUM : ln[R / (1 –R)] = –5.91 + (0.16 × PS) + (0.19 × OS) (R: morbidity)
PS
	1	2	4	8
Age (years)	≦ 60	61-70	≧ 71
Cardiac signs, chest radiograph	No failure	Diuretic, digoxin, anti- anginal or hypertensive therapy	Peripheral oedema, war- farin therapy, borderline cardiomegaly	Raised jugular venous pressure, cardiomegaly
Respiratory history	No dyspnea	Dyspnoea on exertion, Mild COPD	Limiting dyspnoea, Mo- derate COPD	Dyspnoea on rest, Fibr- osis or consolidation
Systolic blood pressure (mmHg)	110-130	100-109, 131-170	90-99, ≧ 171	≦ 89
Pulse rate (Beats/min)	50-80	40-49, 81-100	101-120	≦ 39, ≧ 121
Glasgow coma score	15	12-14	9-11	≦ 8
Hemoglobin (g/100ml)	13-16	11.5-12.9, 16.1-17.0	10.0-11.4, 17.1-18.0	≦ 9.9, ≧ 18.1
White cell count (nmol/mm3)	4,000-10,000	3,100-4,000	≦ 3,000, ≧ 20,100
		10,100-20,000
Plasma urea (nmol/L)	≦ 7.5	7.6-10.0	10.1-15.0	≧ 15.1
Plasma sodium (nmol/L)	≧ 136	131-135	126-130	≦ 125
Plasma potassium (nmol/L)	3.5-5.0	3.2-3.4, 5.1-5.3	2.9-3.1, 5.4-5.9	≦ 2.8, ≧ 6.0
Electrocardiogram	Normal		Artial fibrillation	Any other abnormal rhythm or Q waves or ST/T wave changes
			(rate 60-90)
OS
	1	2	4	8
Operation grade	Minor	Moderate	Major	Major +
Multiple procedures	1		2	>2
Blood loss (ml)	≦ 100	101-500	501-999	≧ 1000
Peritoneal soiling	None	Minor	Local pus	Free bowel content, pus, or blood
		(serous fluid)
Malignancy	None	Primary only	Nodal metastases	Distant metastases
Mode of surgery	Elective		Emergency resuscitation of > 2h possible, Operation < 24h after admission	Emergency (immediarte surgery < 2h needed)
