# Supplementary material for: Risk factors of preoperative complications after colorectal surgery in elderly and relationship between postoperative complications and long-term survival
Source: Research Square preprint supplement (doi:10.21203/rs.3.rs-6798855/v1), 2025-06-17
Supplement: Supplementary file 6 [file db07f56189f9162d900bcbd8.xlsx]

## Sheet: Sheet1
Table 5: Breakdown of postoperative complications in LC for acute cholecystitis
	n	%
Clavien-Dindo classification
No complication	150	58.1395
GradeⅠ	41	15.8915
GradeⅡ	41	15.8915
GradeⅢa	9	3.48837
GradeⅢb	7	2.71318
GradeⅣa	6	2.32558
GradeⅣb	1	0.387597
GradeⅤ	3	1.16279
≥GradeⅡ	67	25.969
Conplications ≥GradeⅡ
Non-surgical
Cardiovascular	4	1.55039
Respiratory	22	8.52713
Urinary	11	4.26357
Neurogenic	3	1.16279
Others	7	2.71318
Surgical
Intestinal paralysis, obstruction	10	3.87597
Leakage	5	1.93798
Inflammation, abscess	11	4.26357
Intraoperative injury	3	1.16279
Postoperative bleeding	3	1.16279
Stoma problems	4	1.55039
